# Supplementary material for: Facile hydrothermal synthesis of tubular kapok fiber/MnO2composites and application in supercapacitors
Source: Royal Society of Chemistry journal article supplement (doi:10.1039/c5ra13602d), 2015-01-01
Supplement: c5ra13602d1.pdf [file c5ra13602d1.pdf]

## Facile hydrothermal synthesis of tubular kapok fiber/ $\text{MnO}_2$ hybrid composites and application in supercapacitors

Weibing Xu<sup>ab</sup>, Bin Mu,<sup>a</sup> Wenbo Zhang<sup>a</sup> and Aiqin Wang,<sup>a\*</sup>

<sup>a\*</sup> State Key Laboratory of Solid Lubrication, Center of Eco-Materials and Green Chemistry, Lanzhou Institute of Chemical Physics, Chinese Academy of Sciences, Lanzhou 730000, China.

<sup>b</sup> University of the Chinese Academy of Sciences, Beijing 100049, P.R. China.

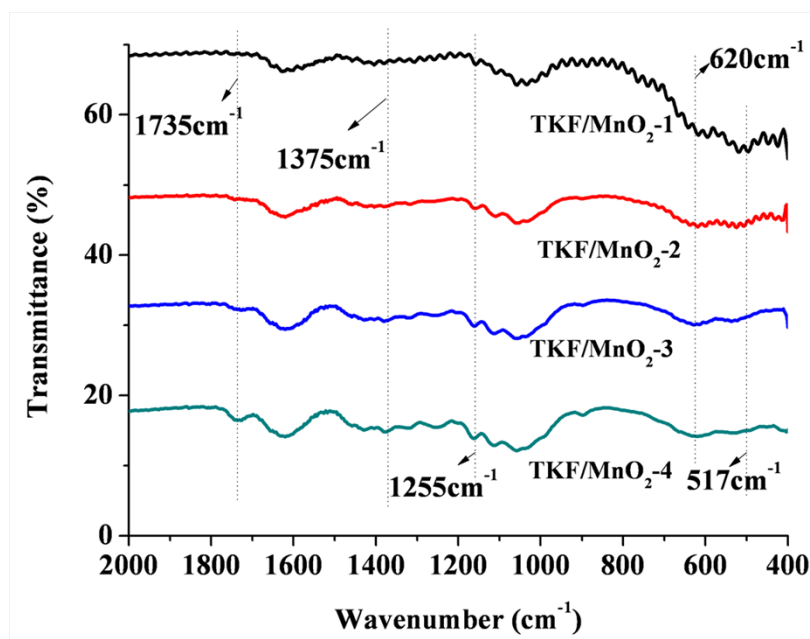

Fig.S1 FTIR spectra of TKF/MnO<sub>2</sub>-1, TKF/MnO<sub>2</sub>-2, TKF/MnO<sub>2</sub>-3 and TKF/MnO<sub>2</sub>-4 composites

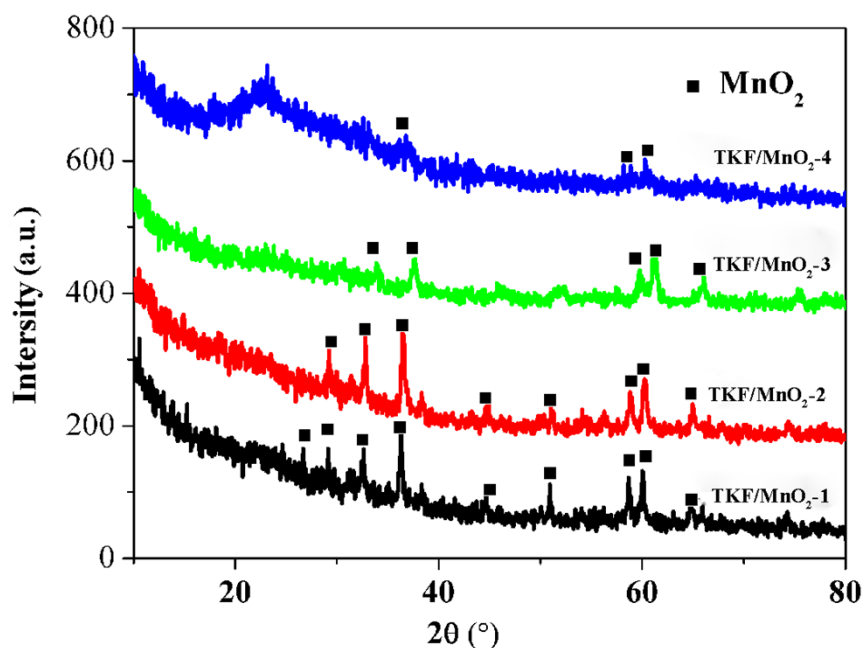

Fig.S2 XRD spectra of TKF/MnO<sub>2</sub>-1, TKF/MnO<sub>2</sub>-2, TKF/MnO<sub>2</sub>-3 and TKF/MnO<sub>2</sub>-4 composites

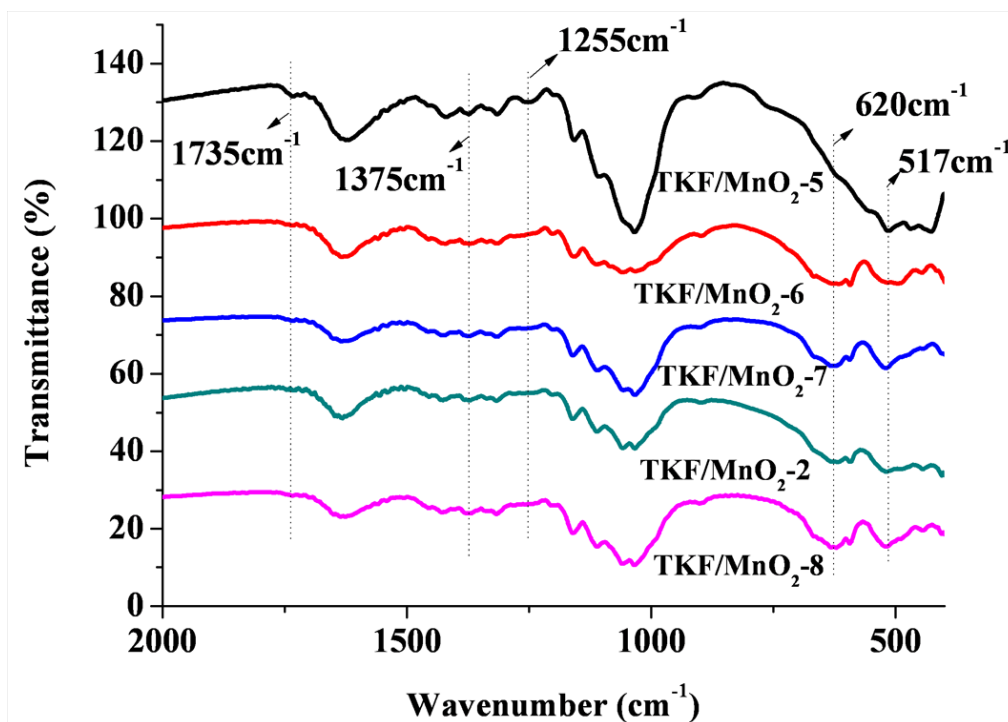

Fig.S3 FTIR spectra of TKF/MnO<sub>2</sub>-5, TKF/MnO<sub>2</sub>-6, TKF/MnO<sub>2</sub>-7, TKF/MnO<sub>2</sub>-2 and TKF/MnO<sub>2</sub>-8 composites

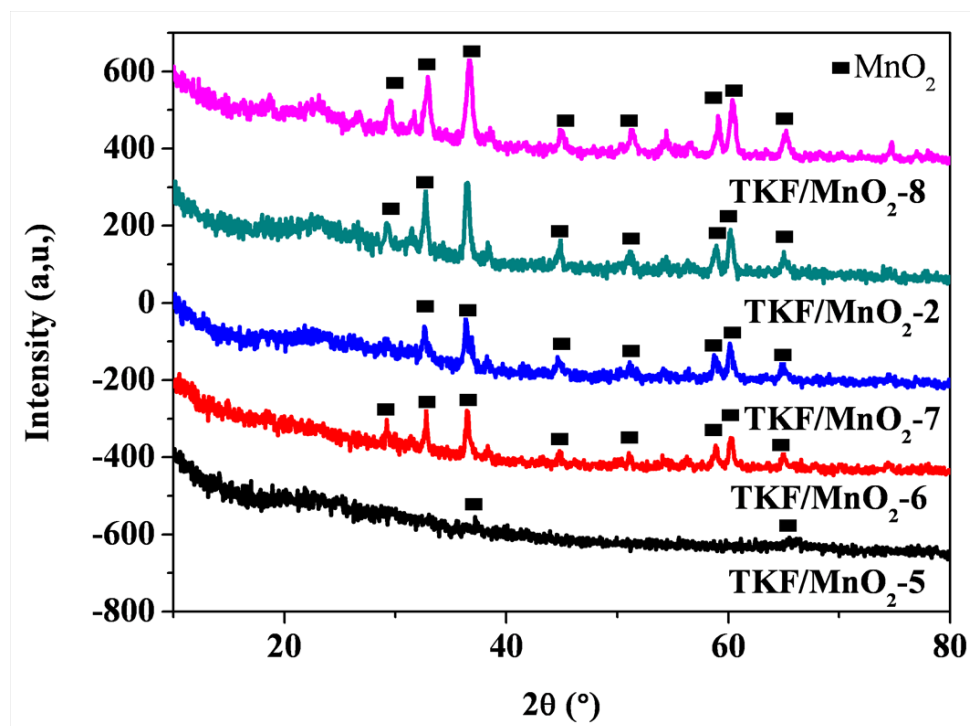

Fig.S4 XRD spectra of TKF/MnO<sub>2</sub>-5, TKF/MnO<sub>2</sub>-6, TKF/MnO<sub>2</sub>-7, TKF/MnO<sub>2</sub>-2 and TKF/MnO<sub>2</sub>-8 composites

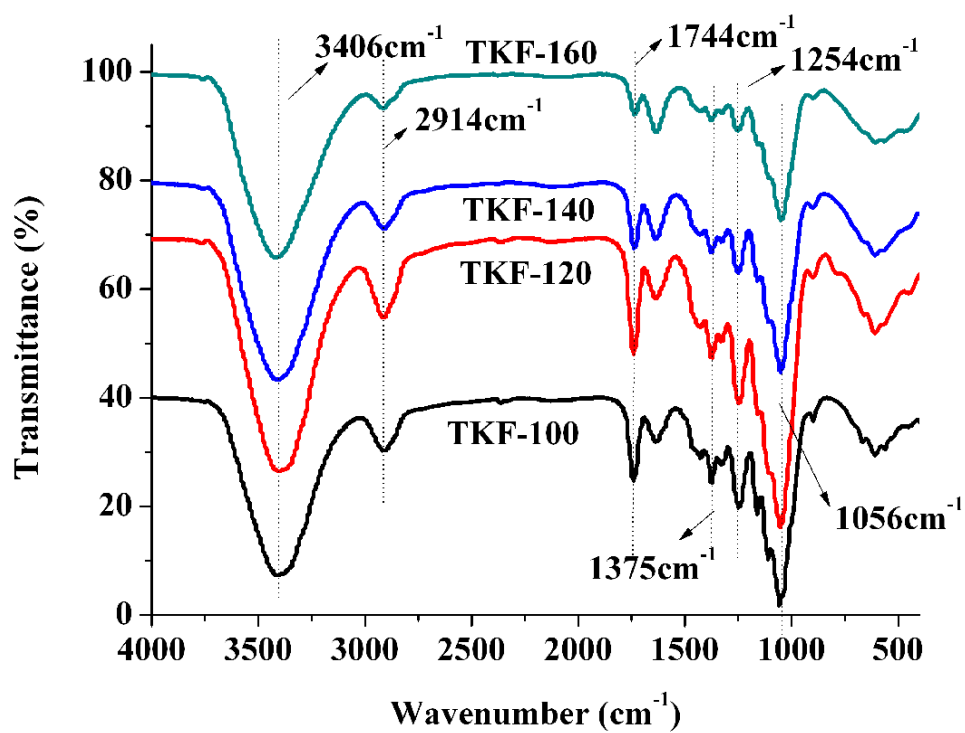

Fig.S5 FTIR spectra of TKF-100, TKF-120, TKF -140, and TKF-160

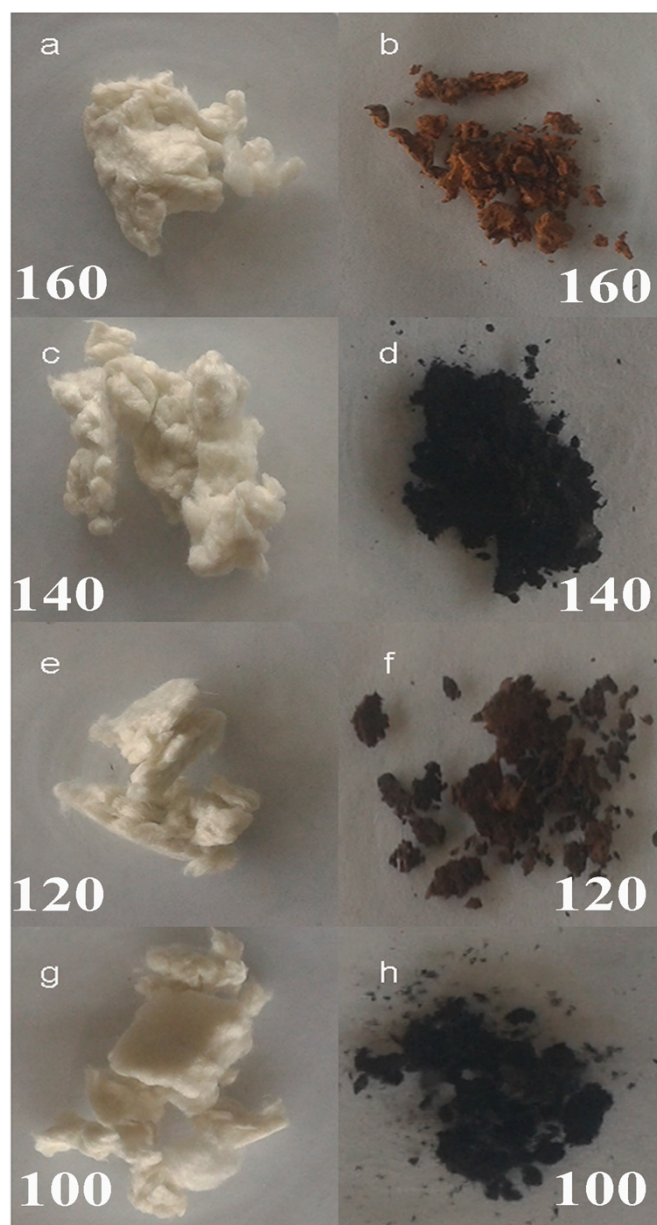

**Fig.S6** Digital photos of the hydrothermally treated TKF and TKF/MnO<sub>2</sub> composites prepared at different hydrothermal temperature: (a) TKF-160, (b) TKF/MnO<sub>2</sub>-11, (c) TKF-140, (d) TKF/MnO<sub>2</sub>-6 (e) TKF -120, (f) TKF/MnO<sub>2</sub>-10, (g) TKF-100, and (h) TKF/MnO<sub>2</sub>-9

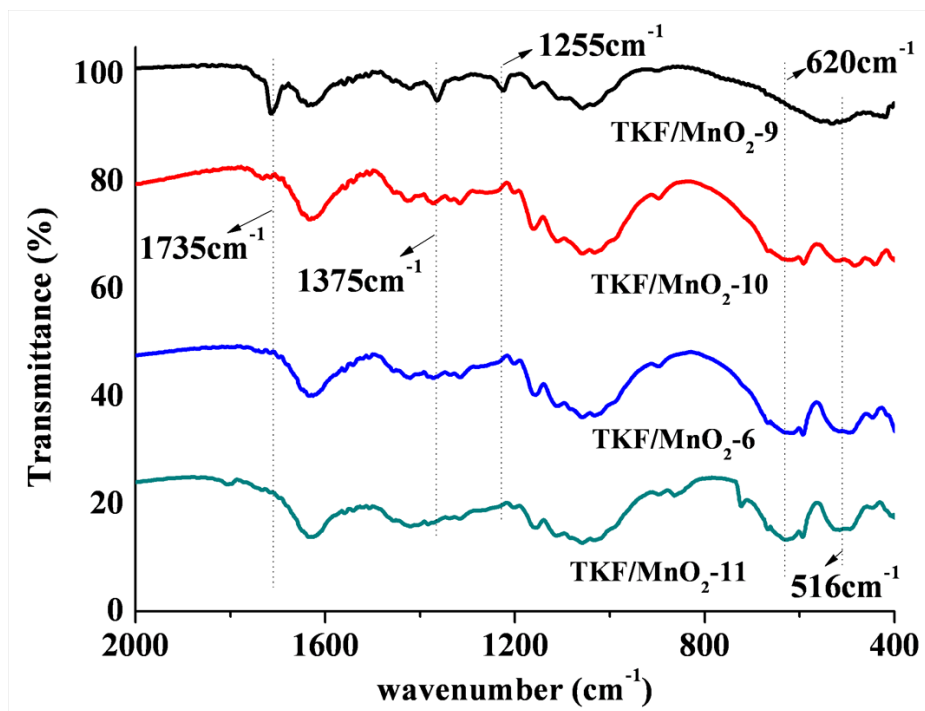

Fig.S7 FTIR spectra of TKF/MnO<sub>2</sub>-6, TKF/MnO<sub>2</sub>-9, TKF/MnO<sub>2</sub>-10 and TKF/MnO<sub>2</sub>-11 composites

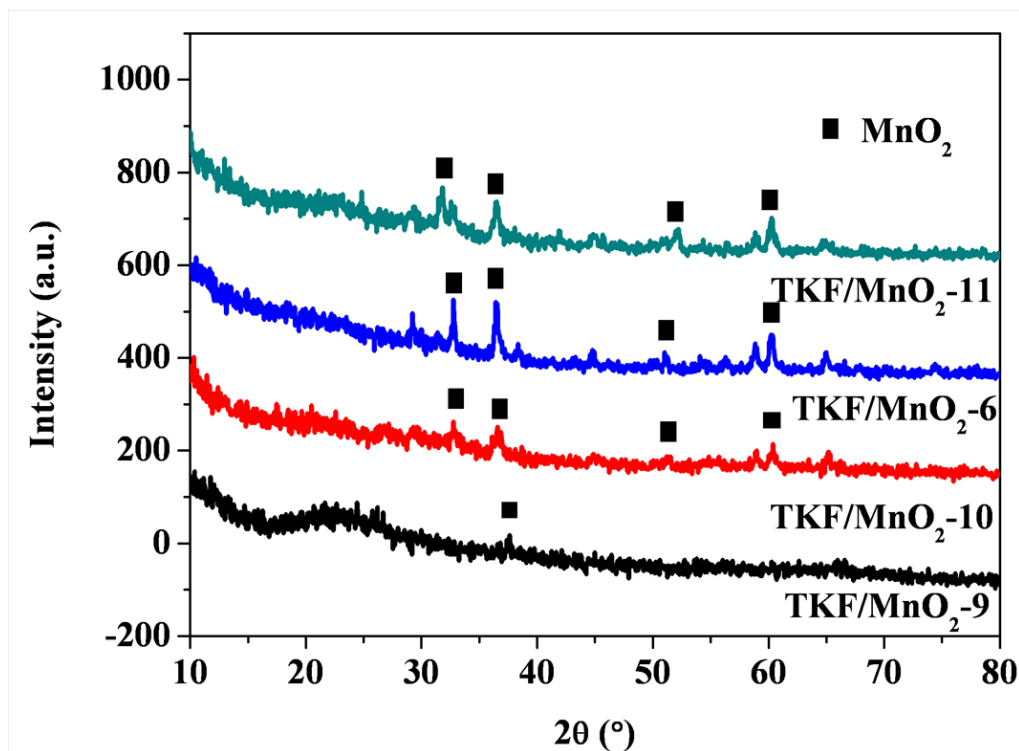

Fig.S8 XRD spectra of TKF/MnO<sub>2</sub>-6, TKF/MnO<sub>2</sub>-9, TKF/MnO<sub>2</sub>-10 and TKF/MnO<sub>2</sub>-11 composites

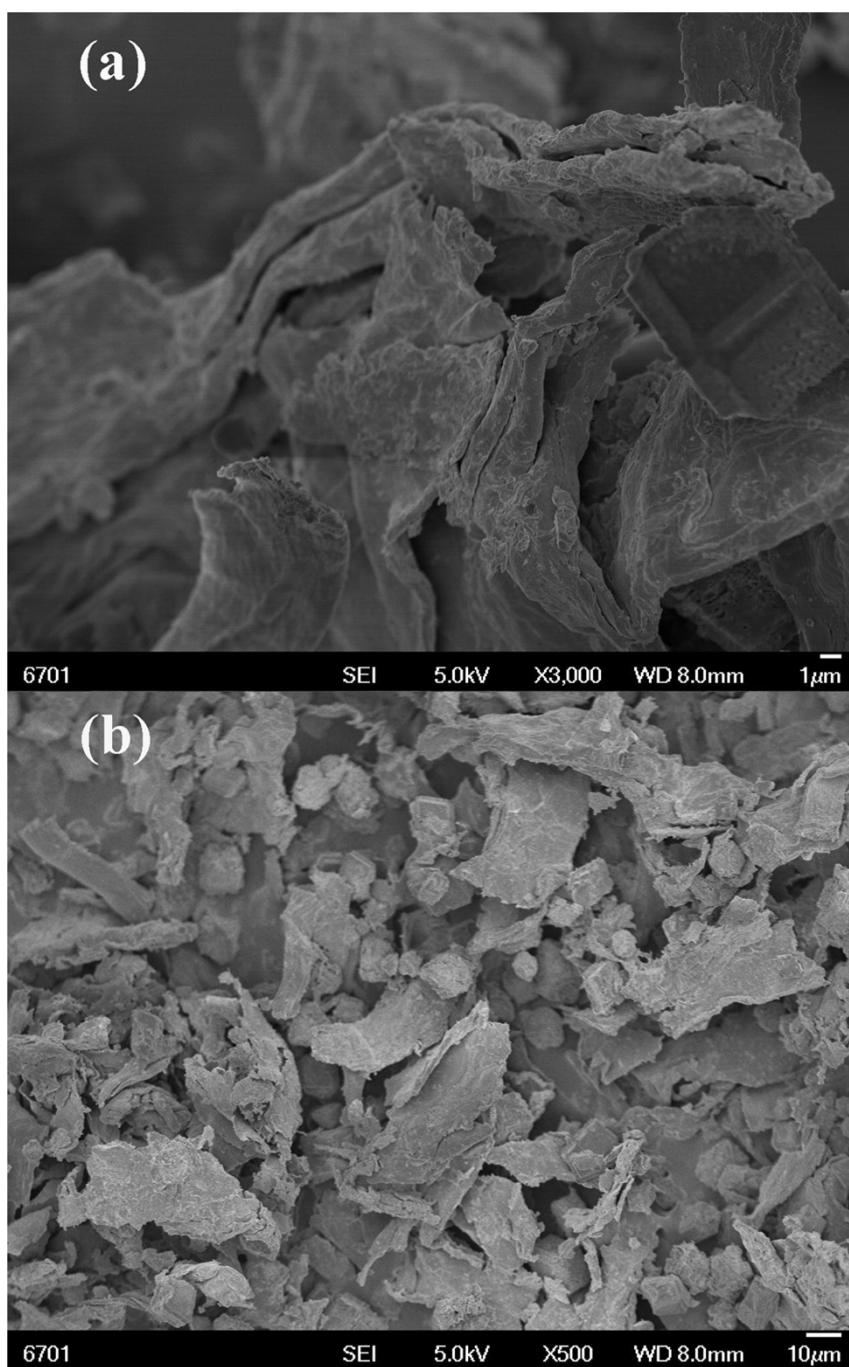

**Fig.S9** SEM images of TKF/MnO<sub>2</sub>-11

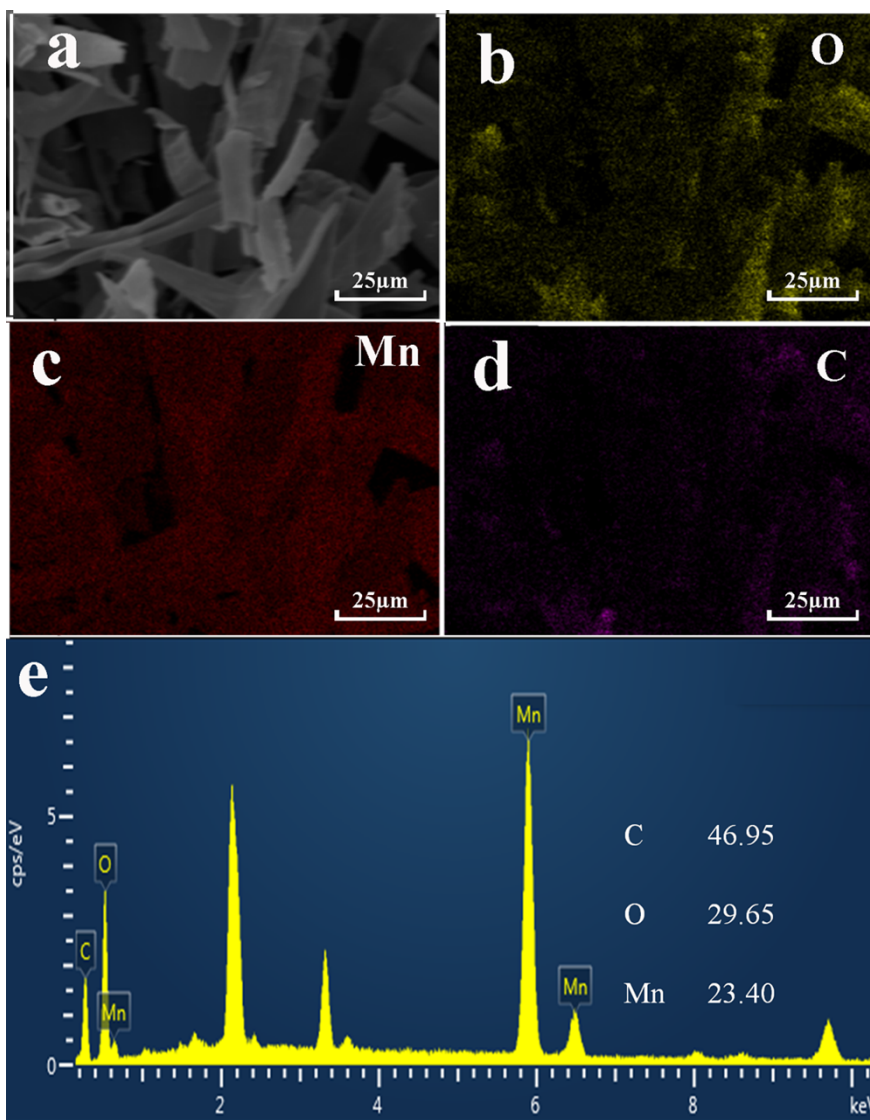

**Fig.S10** (a-d) Element mapping images of TKF/MnO<sub>2</sub>-5 (e) EDX pattern of TKF/MnO<sub>2</sub>-5, the inset shows the atomic ratio of Mn, O and C

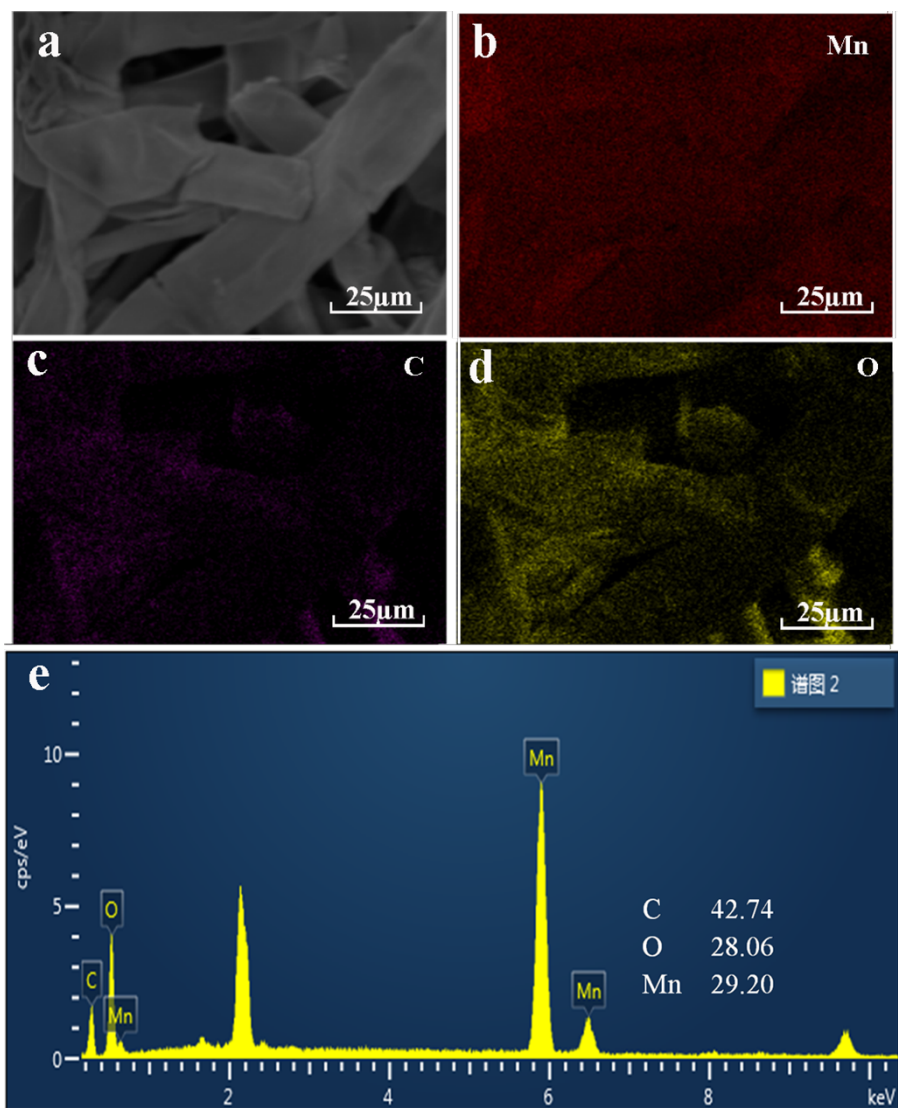

**Fig.S11** (a-d) Element mapping images of TKF/MnO<sub>2</sub>-7 (e) EDX pattern of TKF/MnO<sub>2</sub>-7, the inset shows the atomic ratio of Mn, O and C



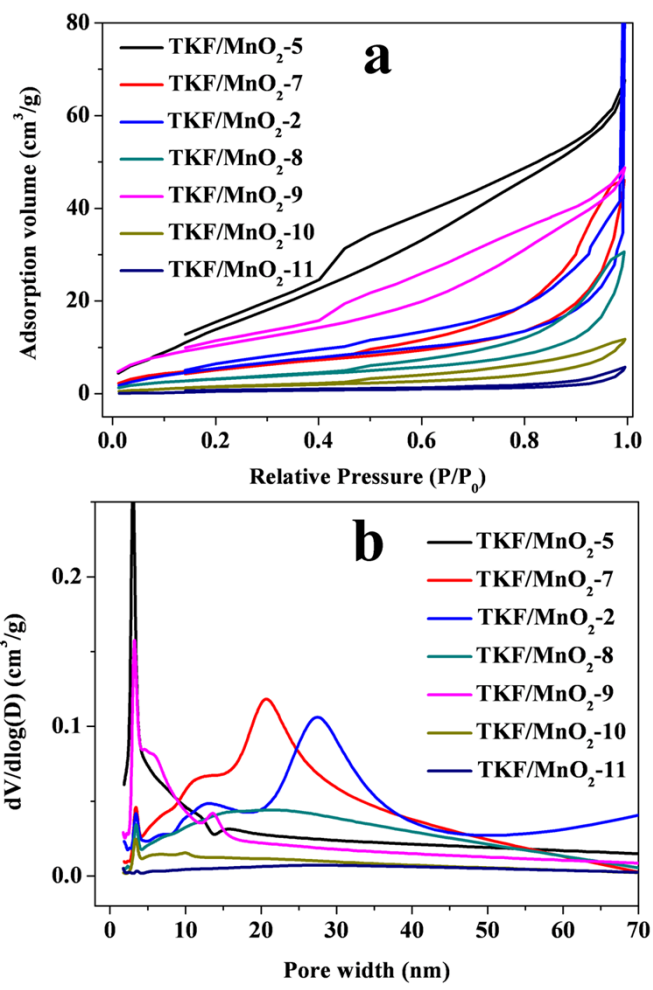

Fig.S12 (a) N<sub>2</sub> adsorption/desorption isotherms and (b) BJH pore size distribution of TKF/MnO<sub>2</sub>-2, 5 ~ 11 composites

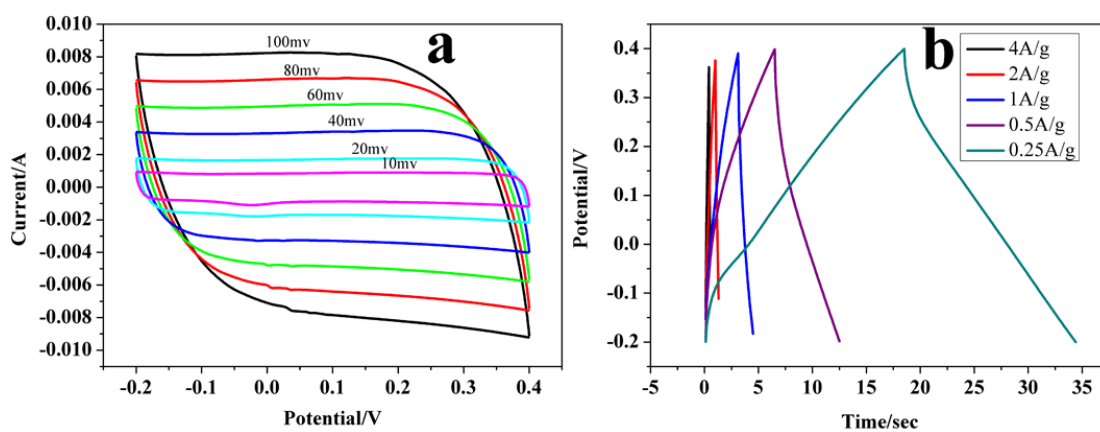

Fig.S13 (a) CV curves at different scan rates, (b) GCD curves at different current density for the TKF/MnO<sub>2</sub>-2 composite in 1 M Na<sub>2</sub>SO<sub>4</sub> electrolyte

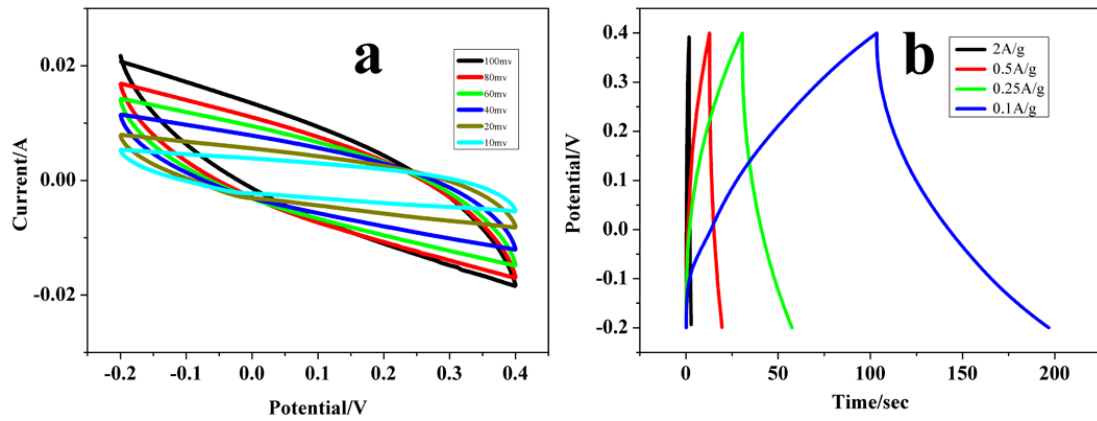

**Fig.S14** (a) CV curves at different scan rates, (b) GCD curves at different current density for the TKF/MnO<sub>2</sub>-5 composite in 1 M Na<sub>2</sub>SO<sub>4</sub> electrolyte

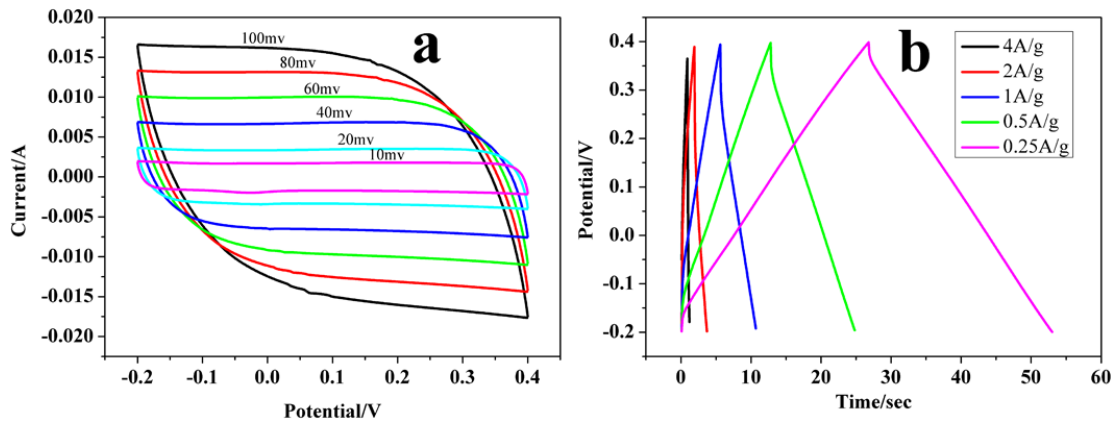

**Fig.S15** (a) CV curves at different scan rates, (b) GCD curves at different current density for the TKF/MnO<sub>2</sub>-7 composite in 1 M Na<sub>2</sub>SO<sub>4</sub> electrolyte

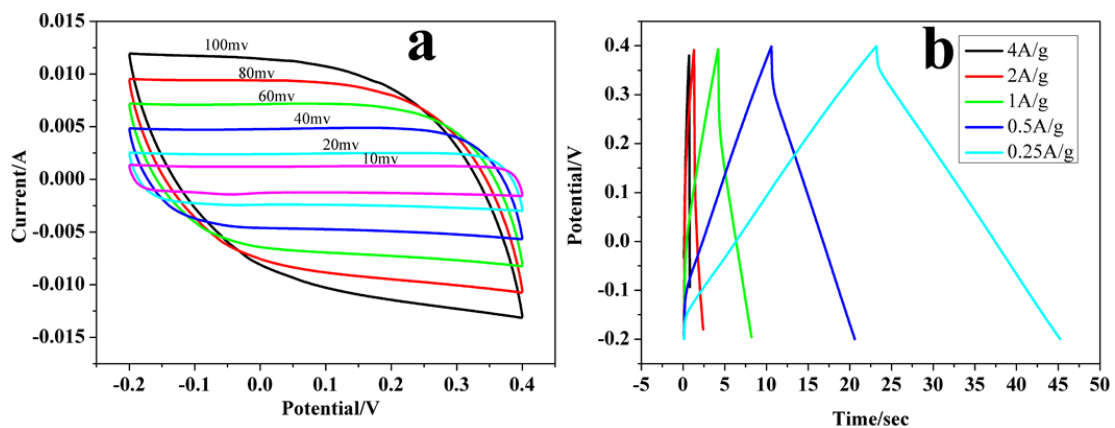

**Fig.S16** (a) CV curves at different scan rates, (b) GCD curves at different current density for the TKF/MnO<sub>2</sub>-8 composite in 1 M Na<sub>2</sub>SO<sub>4</sub> electrolyte

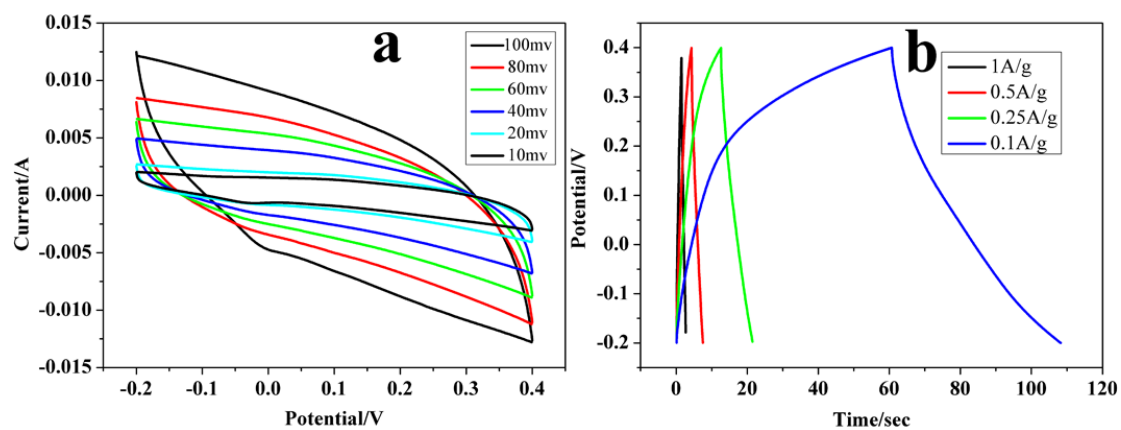

Fig.S17 (a) CV curves at different scan rates, (b) GCD curves at different current density for the TKF/MnO<sub>2</sub>-9 composite in 1 M Na<sub>2</sub>SO<sub>4</sub> electrolyte

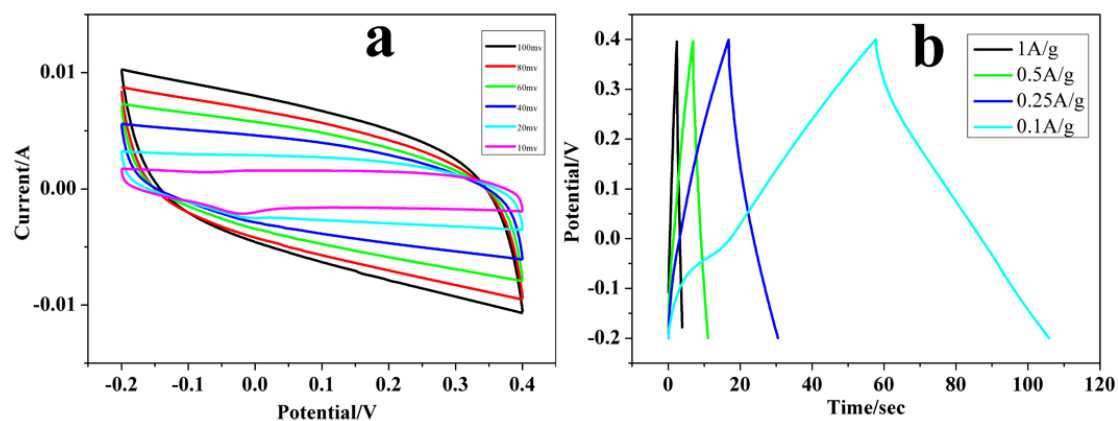

Fig.S18 (a) CV curves at different scan rates, (b) GCD curves at different current density for the TKF/MnO<sub>2</sub>-10 composite in 1 M Na<sub>2</sub>SO<sub>4</sub> electrolyte

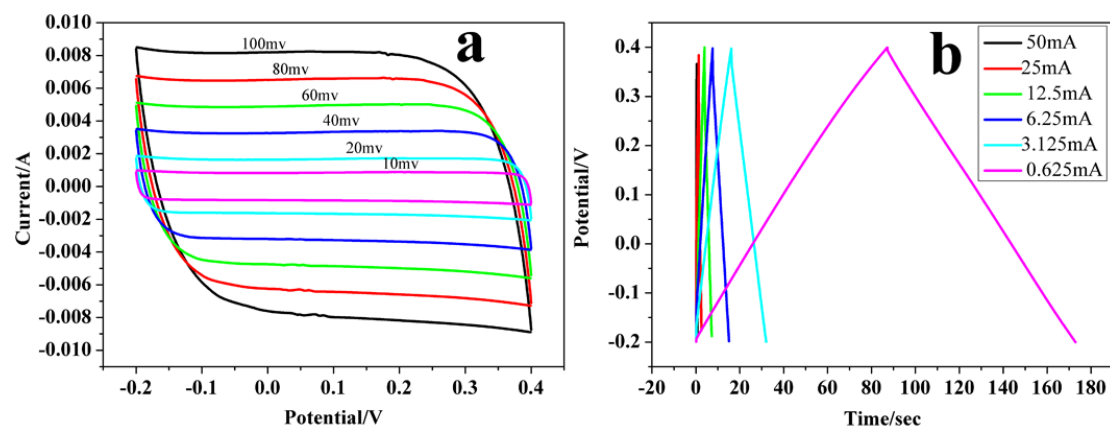

Fig.S19 (a) CV curves at different scan rates, (b) GCD curves at different current density for the TKF/MnO<sub>2</sub>-11 composite in 1 M Na<sub>2</sub>SO<sub>4</sub> electrolyte

**Table S1.** N<sub>2</sub> adsorption/desorption analyses of TKF and TKF/MnO<sub>2</sub> composites

| Sample                   | <sup>a</sup> S <sub>BET</sub> (m <sup>2</sup> /g) | <sup>b</sup> S <sub>ext</sub> (m <sup>2</sup> /g) | <sup>c</sup> V <sub>tot</sub> (cm <sup>3</sup> /g) |
|--------------------------|---------------------------------------------------|---------------------------------------------------|----------------------------------------------------|
| TKF                      | 0.8875                                            | -                                                 | 0.0012                                             |
| TKF/MnO <sub>2</sub> -5  | 65.97                                             | 107.37                                            | 0.0941                                             |
| TKF/MnO <sub>2</sub> -6  | 222.41                                            | 261.93                                            | 0.4962                                             |
| TKF/MnO <sub>2</sub> -7  | 20.66                                             | 24.19                                             | 0.0520                                             |
| TKF/MnO <sub>2</sub> -2  | 18.19                                             | 34.51                                             | 0.0431                                             |
| TKF/MnO <sub>2</sub> -8  | 12.30                                             | 15.15                                             | 0.0335                                             |
| TKF/MnO <sub>2</sub> -9  | 6.63                                              | 9.32                                              | 0.0143                                             |
| TKF/MnO <sub>2</sub> -10 | 23.25                                             | 25.67                                             | 0.0681                                             |
| TKF/MnO <sub>2</sub> -11 | 39.15                                             | 47.00                                             | 0.0057                                             |

<sup>a</sup> BET (Brunauer-Emmett-Teller) surface area, <sup>b</sup> External surface area, calculated using *t*-plot method, <sup>c</sup> Total pore volume, measured at P/P<sub>0</sub> = 0.975

**Table S2** Comparison of capacitive performance of the supercapacitors based on various Natural fiber composites presented in literature and the present work.

| Sample                                                 | C <sub>max</sub>                         | Ref       |
|--------------------------------------------------------|------------------------------------------|-----------|
| Cotton fiber/SWNT-MnO <sub>2</sub>                     | 210 F g <sup>-1</sup>                    | [1]       |
| Carbon fiber/MnO <sub>2</sub>                          | 0.41 F cm <sup>-2</sup> ,                | [2]       |
| Carbon fiber/MnO <sub>2</sub>                          | 110 F g <sup>-1</sup>                    | [3]       |
| Textile fiber/graphene/MnO <sub>2</sub>                | 315 F g <sup>-1</sup>                    | [4]       |
| Polyester fibers/CNT/MnO <sub>2</sub>                  | 2.8 F cm <sup>-2</sup>                   | [5]       |
| Carbon/MnO <sub>2</sub>                                | 190 F g <sup>-1</sup>                    | [6]       |
| Cotton fiber/ SWNT                                     | 70 F g <sup>-1</sup>                     | [7]       |
| Activated carbon textile/MnO <sub>2</sub>              | 70 F g <sup>-1</sup>                     | [8]       |
| Cotton lawn                                            | 83 F g <sup>-1</sup>                     | [9]       |
| Cotton-based carbon fibers                             | 355 F g <sup>-1</sup>                    | [10]      |
| Cotton fiber/PPy/LGS                                   | 304 F g <sup>-1</sup>                    | [11]      |
| Bacterial cellulose/PANI                               | 273 F g <sup>-1</sup>                    | [12]      |
| Cellulose Fiber/CNT/MnO <sub>2</sub> /CNT              | 290 F g <sup>-1</sup>                    | [13]      |
| Cotton fiber/PPy                                       | 268 F g <sup>-1</sup>                    | [14]      |
| Cellulose fiber/PANI/silver                            | 176 mF/cm <sup>2</sup>                   | [15]      |
| Cellulose fiber/reduced graphene oxide/carbon nanotube | 252 F g <sup>-1</sup>                    | [16]      |
| PPy-MnO <sub>2</sub> -CNT-cotton                       | 38.6 mF cm <sup>-2</sup> (two electrode) | [17]      |
| PPy/cotton fiber                                       | 52 F g <sup>-1</sup>                     | [18]      |
| PPy/bacterial cellulose                                | 459.5 F g <sup>-1</sup> .                | [19]      |
| Au/PPy cotton fabric                                   | 254.9 F g <sup>-1</sup>                  | [20]      |
| Kapok fiber/MnO <sub>2</sub>                           | 117 F g <sup>-1</sup>                    | This work |

C<sub>max</sub>, maximum specific capacitance

- 1 L. B. Hu, M. Pasta, F. L. Mantia, L. F. Cui, S. Jeong, H. D. Deshazer, J. W. Cho, S. M. Han, Y. Cui, *Nano letters*, 2010, **10**,708-714.
- 2 X. Xiao, T. Q. Li, P. H. Yang, Y. Gao, H. Y. Jin, W. J. Ni, W. H. Zhan, X. H. Zhang, Y. Z. Cao, J. W. Zhong, L. Gong, W. C. Yen, W. J. Mai, J. Chen, K.F. Huo, Y. L. Chu, Z. L. Wang, J. Zhou, *Acs Nano*, 2012, **6**, 9200-9206.
- 3 A. E. Fischer, K. A. Pettigrew, D. R. Rolison, R. M. Stroud, J. W. Long, *Nano Letters*, 2007, **7**, 281-286.
- 4 G. H. Yu, L. B. Hu, M. Vosgueritchian, H. L. Wang, X. Xie, J. R. McDonough, X. Cui, Y. Cui, Z. N. Bao. *Nano letters*, 2011, **11**, 2905-2911.
- 5 L. B. Hu, W. Chen, X. Xie, N. Liu, Y. Yang, H. Wu, Y. Yao, M. Pasta, H. N. Alshareef, Y. Cui, *Acs Nano*, 2011, **5**, 8904-8913.
- 6 J. K. Chang, C. T. Lin, W. T. Tsai, *Electrochemistry communications*, 2004, **6**, 666-671.
- 7 M. Pasta, F. L. Mantia, L.B. Hu, H. D. Deshazer, Y. Cui, *Nano Research*, 2010, **3**, 452-458.
- 8 L. H. Bao, X. D. Li, *Advanced Materials*, 2012, **24**, 3246-3252.
- 9 K. Jost, C. R. Perez, J. K. McDonough, V. Presser, M. Heon, G. Dion, Y. Gogotsi, *Energy & Environmental Science*, 2011, **4**, 5060-5067.
- 10 S. G. Wang, Z. H. Ren, J. P. Li, Y. Q. Ren, L. Zhao, J. Yu. *RSC Advances*, 2014, **4**, 31300-31307.
- 11 L. G. Zhu, L. Wu, Y. Y. Sun, M. X. Li, J. Xu, Z.K. Bai, G. J. Liang, L. Liu, D. Fang, W. L. Xu C, *RSC Advances*, 2014, **4**, 6261-6266.
- 12 H. H. Wang, E. W. Zhu, J.Z. Yang, P. P. Zhou, D. P. Sun, W. H. Tang, *The Journal of Physical Chemistry C*, 2012, **116**, 13013-13019.
- 13 Z. Gui, H. L. Zhu, E. Gillette, X. G. Han, G. W. Rubloff, L. B. Hu, S. B. Lee, *ACS nano*, 2013, **7**, 6037-6046.
- 14 K. F. Babu, S. P. S. Subramanian, M. A. Kulandainathan, *Carbohydrate polymers*, 2013, **94**, 487-495.
- 15 X. D. Zhang, Z. Y. Lin, B. Chen, W. Zhang, S. Sharmad, W. T. Gu, Y. L. Deng, *Journal of Power Sources*, 2014, **246**, 283-289.

- 16 Q. F. Zheng, Z. Y. Cai, Z. Q. Ma, S. Q. Gong, *ACS applied materials & interfaces*, 2015, **7**, 3263–3271.
- 17 N. S. Liu, W. Z. Ma, J. Y. Tao, X. H. Zhang, J. Su, L.Y. Li, C. X. Yang, Y. H. Gao, D. Golberg, Y. Bando, *Advanced Materials*, 2013, **25**, 4925-4931.
- 18 G. J. Liang, L. G. Zhu, J. Xu, D. Fang, Z. K. Bai, W. L. Xu, *Electrochimica Acta*, 2013, **103**, 9-14.
- 19 J. Xua, L. G. Zhu, Z. K. Bai, G. J. Liang, L. Liu, D. Fang, W. L. Xu, *Organic Electronics*, 2013, **14**, 3331-3338.
- 20 B. B. Yue, C. Y. Wang, X. Ding, G. G. Wallace, *Electrochimica Acta*, 2013, **113**, 17-22.
